# Supplementary material for: Future water storage changes over the Mediterranean, Middle East, and North Africa in response to global warming and stratospheric aerosol intervention
Source: Copernicus journal article supplement (doi:10.5194/egusphere-2023-1654), 2023-07-31
Supplement: Supplementary file 1 [file egusphere-2023-1654-supplement.pdf]

**Future water storage changes over the Mediterranean, Middle East, and North Africa in response to global warming and stratospheric aerosol intervention**

**Abolfazl Rezaei<sup>1,2</sup>, Khalil Karami<sup>3</sup>, Simone Tilmes<sup>4</sup>, John C. Moore<sup>5</sup>**

<sup>1</sup> Department of Earth Sciences, Institute for Advanced Studies in Basic Sciences (IASBS), Zanjan 45137-66731, Iran. [arezaei@iasbs.ac.ir](mailto:arezaei@iasbs.ac.ir); [abolfazlrezaei64@gmail.com](mailto:abolfazlrezaei64@gmail.com).

<sup>2</sup> Center for Research in Climate Change and Global Warming (CRCC), Institute for Advanced Studies in Basic Sciences (IASBS), Zanjan 45137-66731, Iran

<sup>3</sup> Institut für Meteorologie, Stephanstraße 3, 04103 Leipzig, Germany. [khalil.karami@uni-leipzig.de](mailto:khalil.karami@uni-leipzig.de)

<sup>4</sup> National Center for Atmospheric Research, Boulder, CO, USA. [tilmes@ucar.edu](mailto:tilmes@ucar.edu)

<sup>5</sup> Arctic Centre, University of Lapland, Rovaniemi, 96101, Finland. [john.moore.bnu@gmail.com](mailto:john.moore.bnu@gmail.com)

**Table S1.** As in Table 1 but for the SSP5-8.5 global warming and SSP5-8.5-SAI scenarios over 2071-2100.

| Region                             | R1       |              | R2       |              | R3       |              | R4       |              | R5       |              | R6       |              |
|------------------------------------|----------|--------------|----------|--------------|----------|--------------|----------|--------------|----------|--------------|----------|--------------|
|                                    | SSP5-8.5 | SSP5-8.5-SAI |
| Precipitation (mm/yr)              | 337      | 328          | 219      | 212          | 403      | 419          | 97       | 83           | 50       | 48           | 91       | 103          |
| Temperature (°C)                   | 19.7     | 14.8         | 26.1     | 21.5         | 21.2     | 17           | 32.3     | 28.6         | 29.4     | 24.8         | 30.8     | 27.4         |
| Real ET (mm/yr)                    | 470      | 419          | 213      | 205          | 347      | 353          | 89       | 80           | 53       | 50           | 94       | 104          |
| Soil moisture (Kg/m <sup>2</sup> ) | 1756     | 1813         | 1768     | 1792         | 1485     | 1530         | 1428     | 1416         | 1156     | 1164         | 1283     | 1299         |
| TWS (Kg/m <sup>2</sup> )           | 2013     | 2065         | 1773     | 1797         | 1543     | 1586         | 1423     | 1411         | 1171     | 1178         | 1309     | 1325         |
| Potential ET (mm/yr)               | 116      | 78           | 296      | 150          | 114      | 79           | 686      | 299          | 385      | 183          | 613      | 259          |

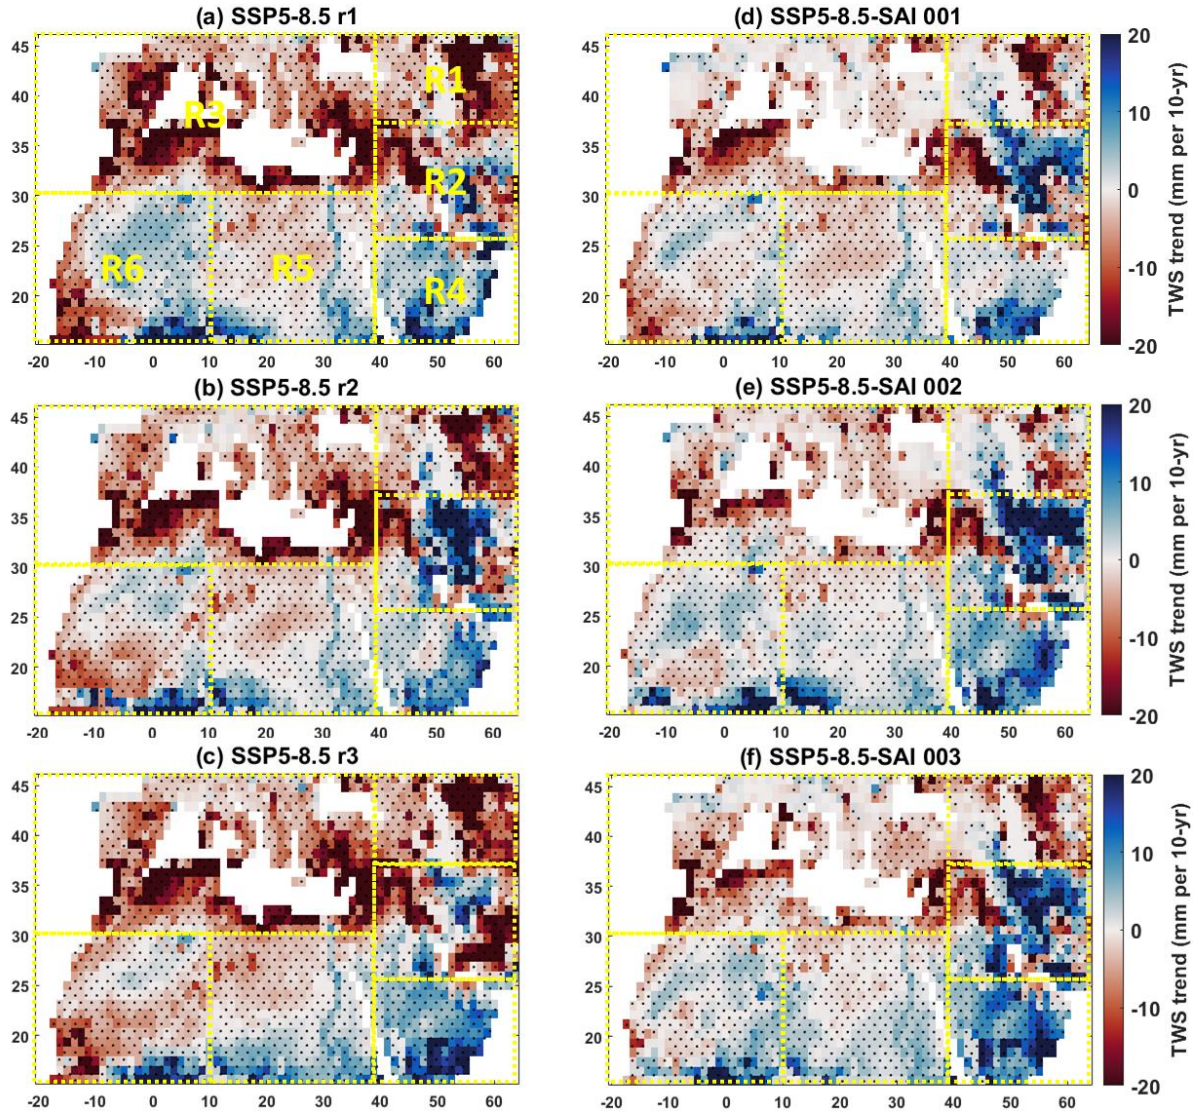

**Figure S1.** The TWS trend maps across MENA over the period (1984–2100) under purely GHG forcing (SSP5-8.5 in a to c) and combined with SAI (SSP5-8.5-SAI in d to f). The dotted regions have trends significant at a 95% confidence level according to the standard simple Mann-Kendall test. R1 to R6 shown in Figure S1a denote the selected regions 1 to 6, respectively.

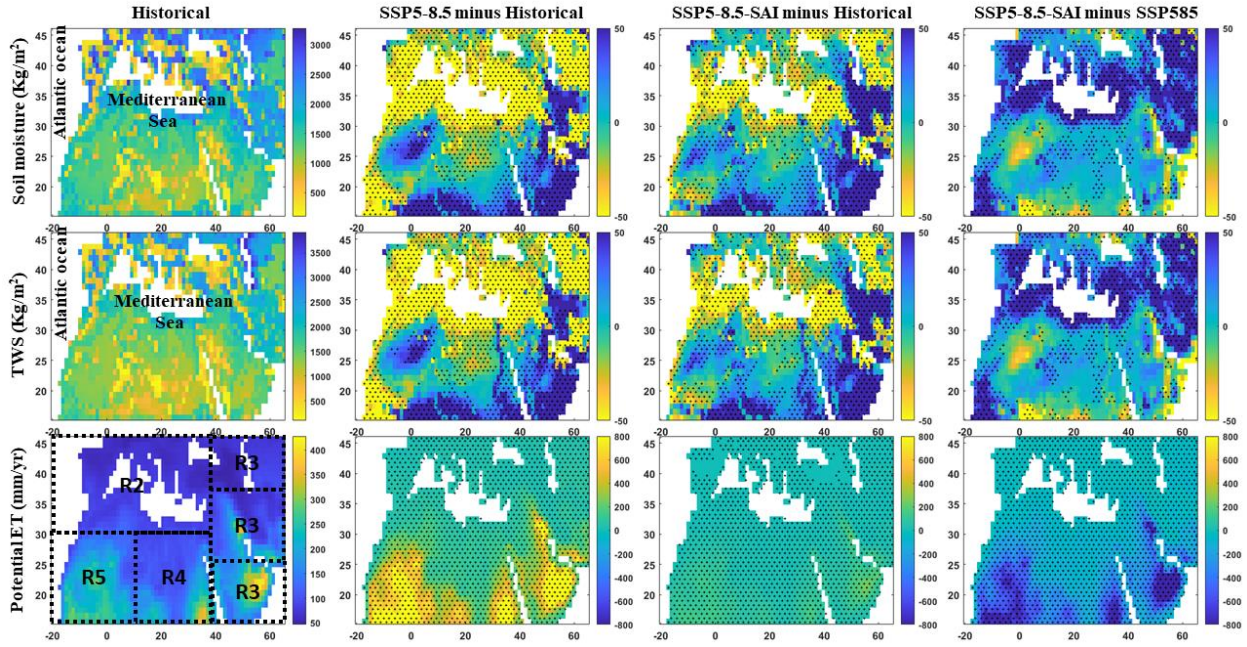

**Figure S2.** The maps of soil moisture (upper row), terrestrial water storage (TWS, middle row), and potential evapotranspiration (ET, bottom row) over MENA in the historical climate (1984–2014) and their projected future changes in the period (2071–2100) under the SSP5-85 scenario without and with SAI (SSP5-8.5 minus historical and SAI minus historical, respectively). The extent to which the SAI impacts the global warming effects on the climate variables is further shown (SAI minus SSP5-8.5). The cross sign (+) highlights where all ensemble members agree on the sign of the changes. R1 to R6 denote to the selected regions 1 to 6, respectively.

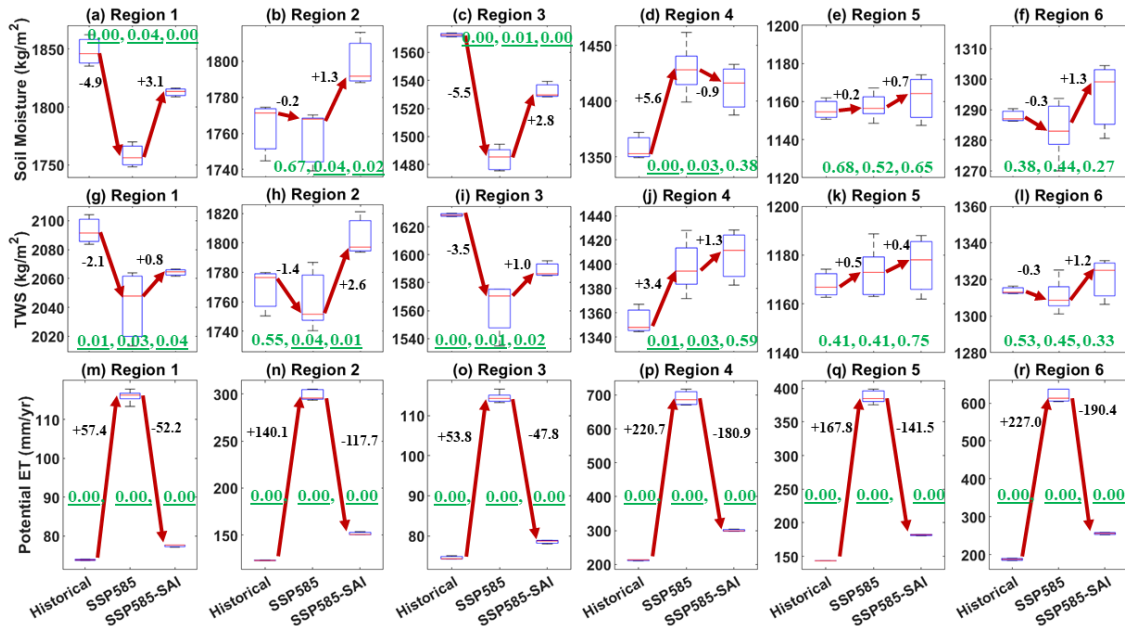

**Figure S3.** Box and whiskers plot of the changes in soil moisture (upper row), terrestrial water storage (TWS, middle row), and potential evapotranspiration (ET, bottom row) in each region from R1 to R6 (e.g., Region 1, Region 2, Region 3, Region 4, Region 5, Region 6). The titles of each subplot refer to the regions. The median for each experiment is denoted by the red line, the upper (75<sup>th</sup>) and lower (25<sup>th</sup>) quartiles by the top and bottom of the box and ensemble limits by the whiskers.

the whisker extents. The positive/negative values in black are the change percent relative to the median of the historical 20<sup>th</sup> period data for each variable, respectively. The three values in green refer to p-values obtained from t-test analysis in which the underlined p-values are statistically significant.

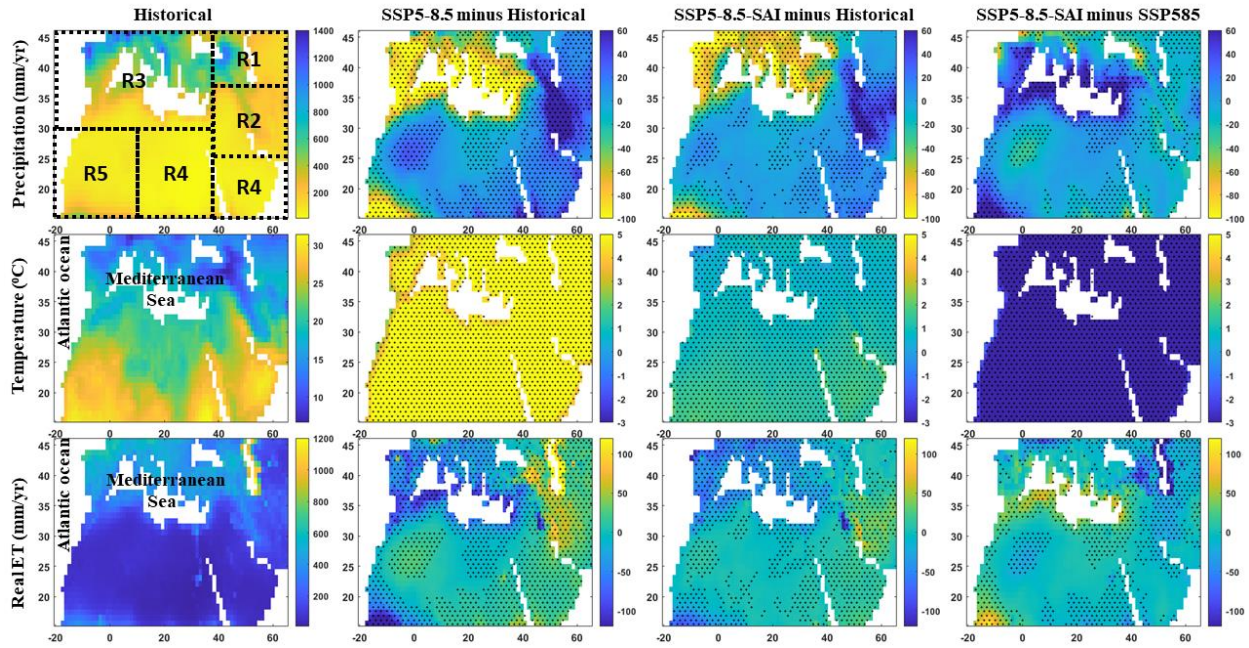

**Figure S4.** As in Fig. S2, but for the variables of precipitation (upper row), surface temperature (middle row), and real evapotranspiration (ET, bottom row).

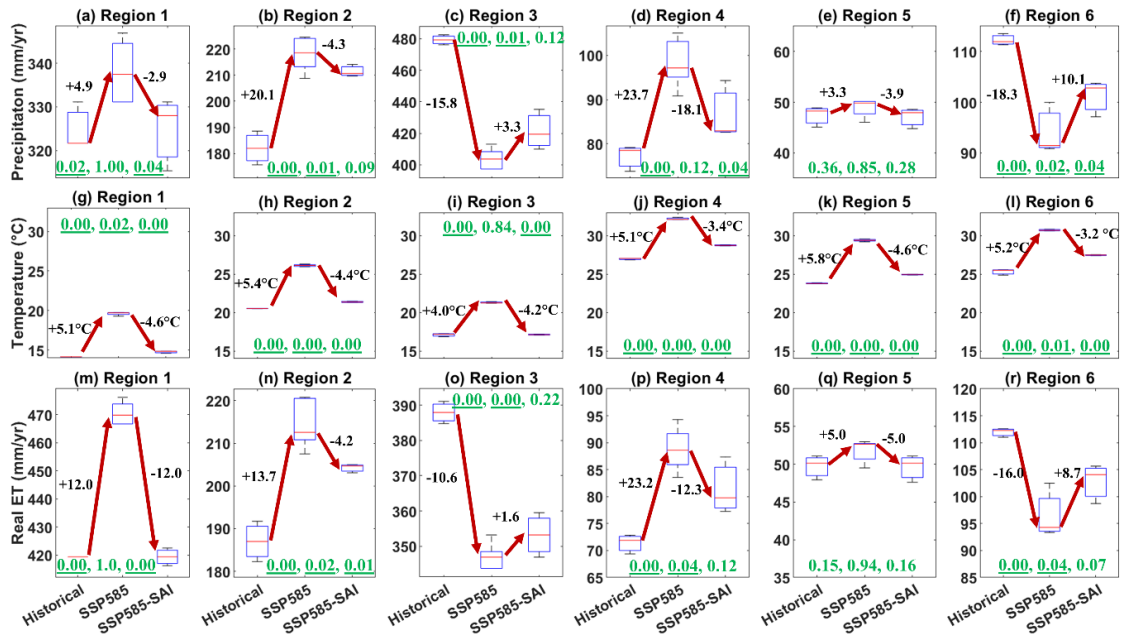

**Figure S5.** As Fig. 3, but for the variables of precipitation (upper row), surface temperature (middle row), and real evapotranspiration (ET, bottom row).
